# Supplementary material
Source: publisher site journal article supplement (https://static.cambridge.org/content/id/urn:cambridge.org:id:article:S1755773919000298/resource/name/S1755773919000298supp001.csv)
Supplement: Supplementary file 1 [file S1755773919000298supp001.csv]

case	JC	Romanistic	Europeanizing	Authoritarian	Old_const
Austria	0	0	0	1	1
Belgium	0	1	0	1	1
Bulgaria	1	0	1	1	0
Croatia	1	0	1	1	0
Czech Republic	0	0	1	1	0
Denmark	0	0	0	1	1
Estonia	1	0	1	1	0
Finland	0	0	0	0	0
France	1	1	0	1	0
Germany	0	0	0	1	0
Greece	1	1	0	1	0
Iceland	0	0	0	0	0
Ireland	0	0	0	0	0
Italy	1	1	0	1	0
Latvia	0	0	1	1	1
Lithuania	1	1	1	1	0
Malta	0	1	1	0	0
Netherlands	0	1	0	1	1
Norway	0	0	0	1	1
Poland	0	0	1	1	0
Portugal	1	1	0	1	0
Slovakia	1	0	1	1	0
Slovenia	1	0	1	1	0
Spain	1	1	0	1	0
Sweden	0	0	0	0	0
Uk	0	0	0	0	0
